# Supplementary material
Source: publisher site journal article supplement (https://www.dovepress.com/article/439119)
Supplement: Supplementary file 1 [file get_supplementary_file.php]

**Drug pricing of domestic anti-PD-L1 antibody adebrelimab: cost-effectiveness analysis of the first-line ES-SCLC treatment in China**

Dongchu Zhou1, Xinrui Dong1, Zhen Zhou2, Qiao Liu1,*

1Department of Pharmacy, the Second Xiangya Hospital of Central South University, Changsha, China; 2School of Public Health and Preventive Medicine, Monash University, Melbourne, VIC, Australia.

***Author for correspondence:** Qiao Liu. Department of Pharmacy, The Second Xiangya Hospital, Central South University, Changsha, Hunan 410000, China ([liuqiao6767@csu.edu.cn](mailto:tanchongqing@csu.edu.cn))**.**

**1. The selection of survival distributions**

We digitized the Kaplan-Meier curves from the CAPSTONE-1 trial using the GetData Graph Digitizer software (version 2.26; <http://www.getdata-graphdigitizer.com/index.php>). These digitized survival data were then fitted and extrapolated with five commonly used parametric survival distributions: exponential, Weibull, log-normal, log-logistic and Gompertz distributions. The selection of the optimal survival distribution for first-line adebrelimab combined with etoposide and platinum (AEP) and first-line etoposide plus platinum (EP) was based on goodness-of-fit measures such as Akaike’s information criterion (AIC) and Bayesian information criterion (BIC), as well as visual fit assessment.

**1.1 OS Fit**

Regarding the fitting of the overall survival (OS) data, **Figure S1-S2** showcased the visual fits of the aforementioned five parametric survival distributions, The comprehensive AIC and BIC statistics were meticulously presented in **Table S1**. While the visual fits indicated that the log-normal distribution, log-logistic distribution and Gompertz distribution yielded similar fits for the published OS data, the log-logistic distribution was deemed the most suitable fit due to its lowest AIC and BIC values.


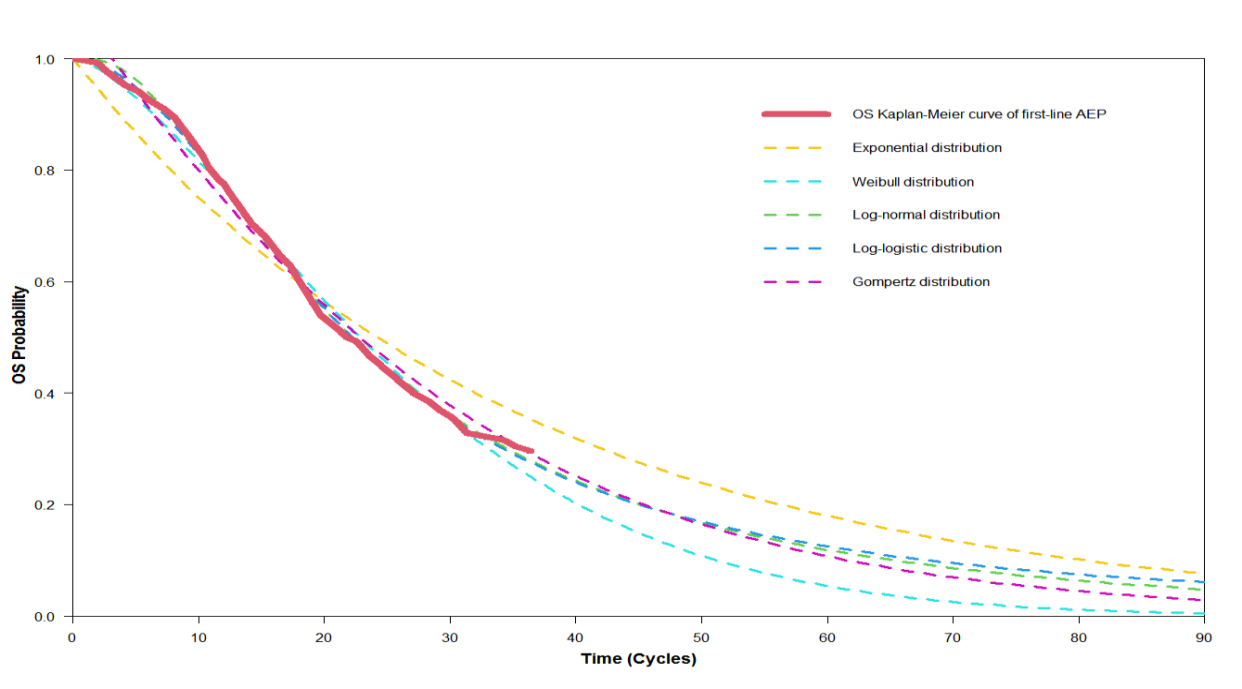


Figure S1. The fitting and extrapolation of OS data of first-line AEP


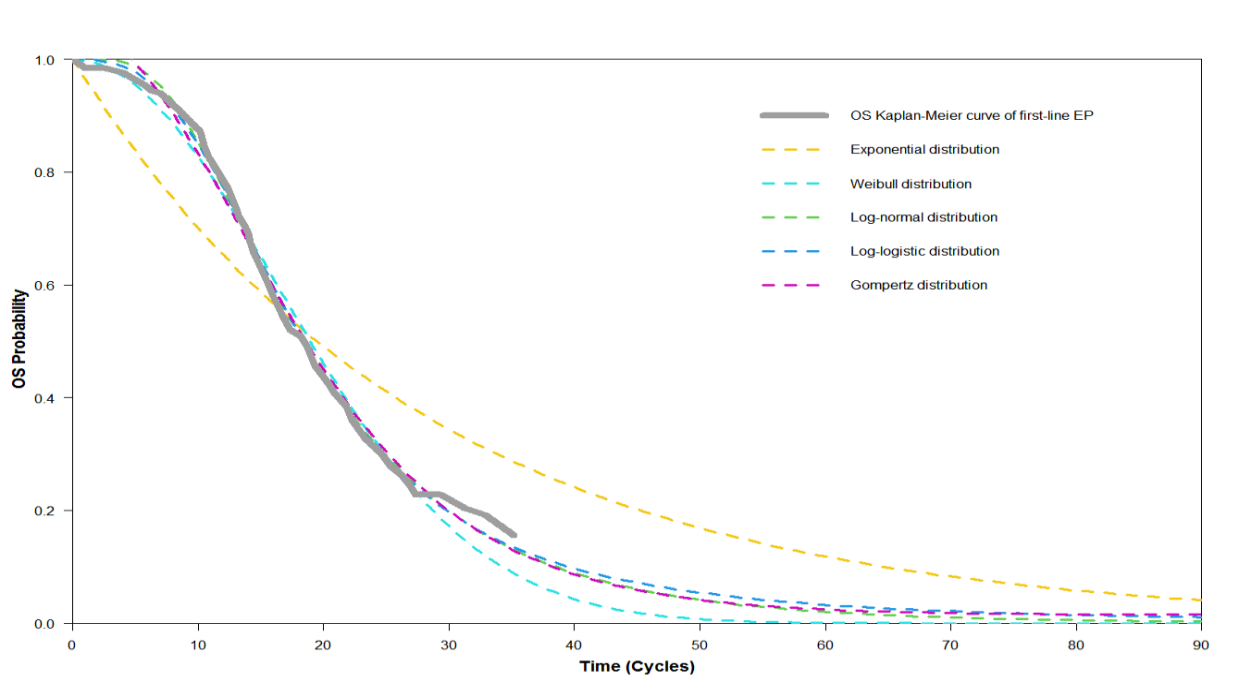


Figure S2. The fitting and extrapolation of OS data of first-line EP

**Table S1. AIC and BIC statistics for OS data.**

| **Parametric survival distribution** | **First-line AEP** | | **First-line EP** | |
| --- | --- | --- | --- | --- |
| **AIC** | **BIC** | **AIC** | **BIC** |
| Exponential | -128 | -124 | -71 | -67 |
| Weibull | -164 | -158 | -173 | -168 |
| Log-normal | -203 | -198 | -232 | -227 |
| Log-logistic | **-204a** | **-198a** | **-245a** | **-239a** |
| Gompertz | -170 | -163 | -116 | -108 |

aThe bold values refer to the minimum AIC and BIC values, indicating the optimal fit.

**1.2 PFS Fit**

Regarding the fitting of progression-free survival (PFS) data, **Figure S3-S4** illustratedthe visual fits of the five aforementioned parametric survival distributions. The corresponding AIC and BIC statistics were provided in **Table S2**. The visual fits revealed that both the exponential distribution and Gompertz distribution displayed higher extended tails, suggesting an overestimation of PFS in the long-term. As a result, the Log-logistic survival distribution was selected for the PFS data due to its lowest BIC and AIC values, as well as exhibiting a superior visual fit.


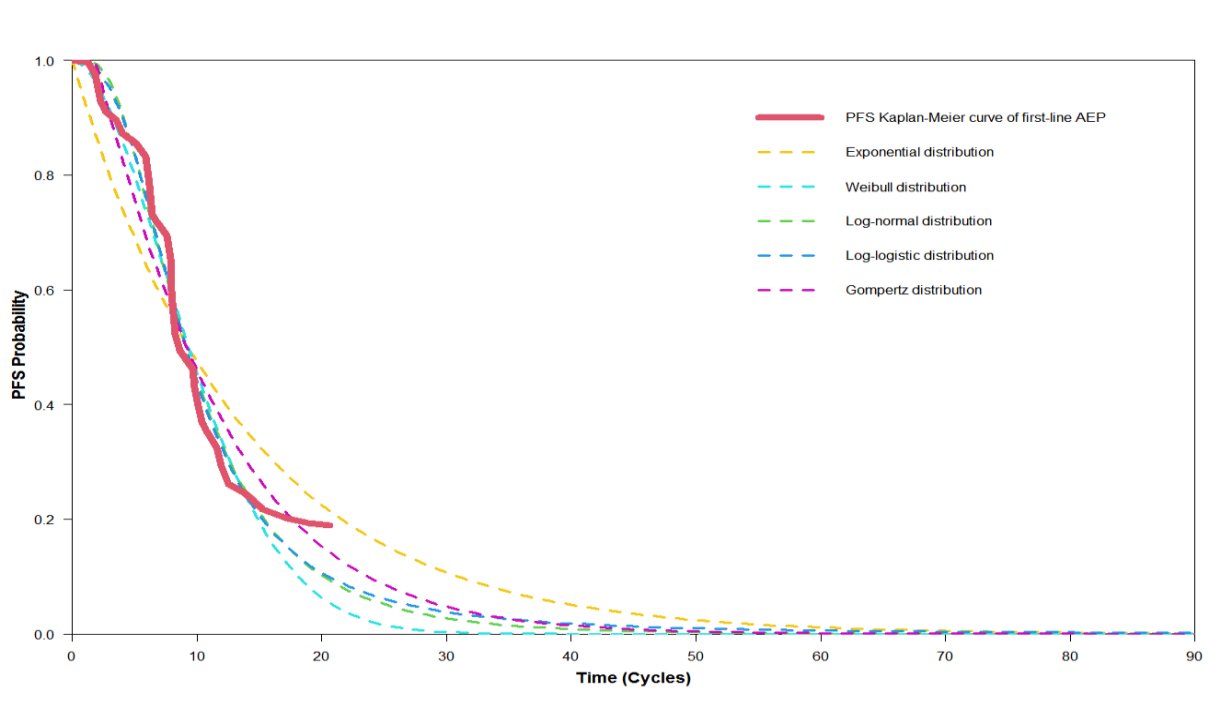


Figure S3. The fitting and extrapolation of PFS data of first-line AEP


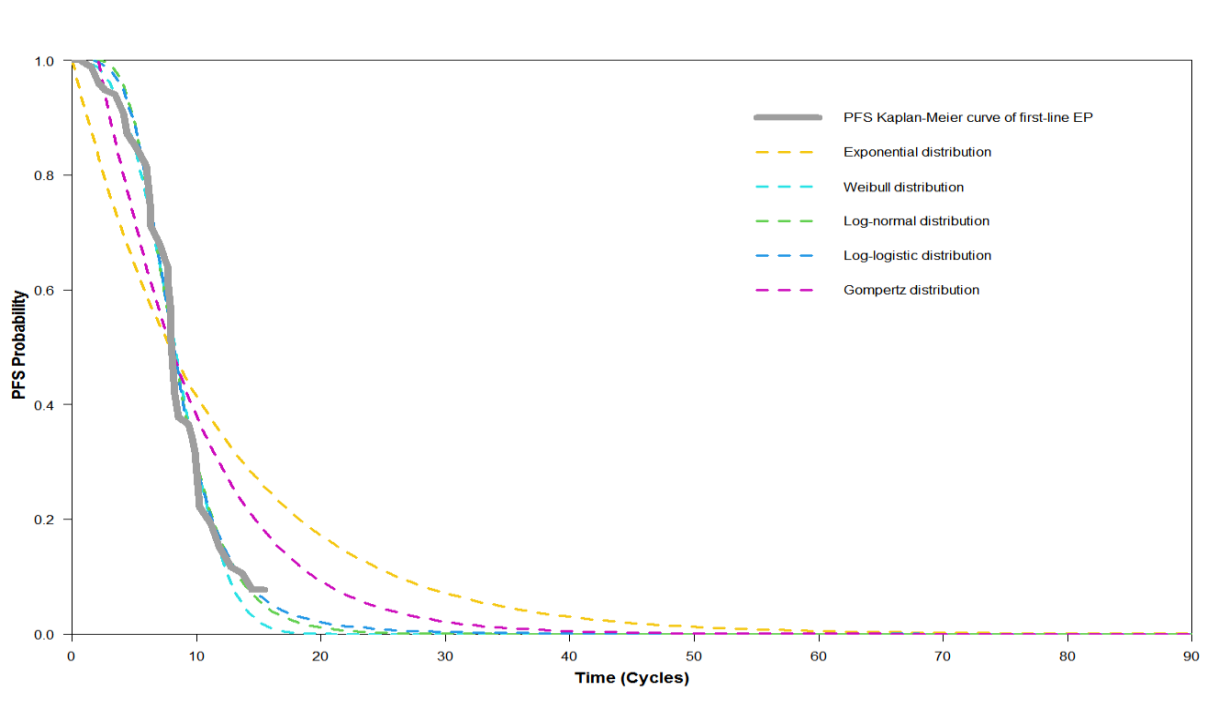


Figure S4. The fitting and extrapolation of PFS data of first-line EP

**Table S2. AIC and BIC statistics for PFS data.**

| **Parametric survival distribution** | **First-line AEP** | | **First-line EP** | |
| --- | --- | --- | --- | --- |
| **AIC** | **BIC** | **AIC** | **BIC** |
| Exponential | -82 | -78 | -45 | -42 |
| Weibull | -88 | -83 | -141 | -136 |
| Log-normal | -108 | -103 | -144 | -139 |
| Log-logistic | **-115a** | **-109a** | **-152a** | **-147a** |
| Gompertz | -104 | -97 | -68 | -61 |

aThe bold values refer to the minimum AIC and BIC values, indicating the optimal fit.

2. **Proportion, costs and disutility of grade III/IV AEs considered in the model**

All AE costs used to inform model was estimated using domestic data. By referring to the clinical guidelines, published literature and local experts' opinions, we first determined the treatment plan for each AE (such as the type of therapeutic drugs, and the drug dose and schedule). We then calculated the cost for each therapeutic drug based on the latest bid-winning price provided by the National Health Industry Data Platform. Finally, we summarized the cost of all therapeutic drugs used for AE management to obtain the treatment cost required for each AE.

To calculate the AE management costs for each first-line treatment, we multiplied the AE frequencies observed for each first-line treatment by their corresponding treatment costs, and then summarized these products to generate a total cost. By analogy, the disutilities related to each first-line treatment were also calculated as a cumulative sum based on the incidence of each AE and the disutility reported for special AE.

Table S3. Proportion, costs and disutility of grade III/IV AEs considered in the model.

| **AE** | **Proportion (%)** | | **Cost per event($)a** | **Disutilityc** |
| --- | --- | --- | --- | --- |
| **First-line AEP** | **First-line EP** |
| Neutrophil count decreased | 75.7% | 75.4% | 1094.28 | 0.20 |
| White blood cell count decreased | 46.1% | 37.9% | 1267.73 | / |
| Platelet count decreased | 38.3% | 33.6% | 1415.63 | / |
| Alanine aminotransferase increased | 2.2% | 1.7% | 292.59 | / |
| Aspartate aminotransferase increased | 1.3% | 1.7% | 292.59 | / |
| γ-glutamyltransferase increased | 1.7% | 0.4% | 292.59 | / |
| Anaemia | 27.8% | 28.4% | 2150.12 | / |
| Nausea | 0.9% | 0.0% | 16.96 | 0.12 |
| Vomiting | 0.9% | 0.4% | 496.90 | 0.12 |
| Decreased appetite | 2.2% | 0.9% | 0b | / |
| Asthenia | 0.4% | 0.4% | 0b | / |
| Hyponatraemia | 2.2% | 2.6% | 316.83 | / |
| Hypertension | 2.6% | 0.9% | 1187.76 | 0.04 |
| Hypokalaemia | 1.7% | 0.0% | 775.05 | / |
| Pneumonia | 1.3% | 0.4% | 1229.23 | / |
| Lymphocyte count decreased | 2.2% | 1.7% | 1267.73 | / |
| Febrile neutropenia | 2.2% | 0.9% | 8890.86 | 0.42 |
| Myelosuppression | 0.9% | 1.3% | 5407.24 | / |
| Estimated AEs Costs and disutility | | |  |  |
| AEs cost for first-line AEP, $ | | | 2907.01 |  |
| AEs cost for first-line EP, $ | | | 2599.55 |  |
| AEs disutility for first-line AEP | | |  | 0.164 |
| AEs disutility for first-line EP | | |  | 0.155 |

*AEs* adverse events, *AEP* adebrelimab combined with etoposide and platinum, *EP* etoposide plus platinum.

aThese AEs management costs were investigated using local data;

bBased on the local oncologists’ opinions, decreased appetite and asthenia do not require additional treatment;

cThe disutility of these AEs corresponding to the diagonal have not been reported or found so far.

**3. Model Parameters and assumptions**

In this Markov model, the impact of parameters uncertainties on the model results was assessed by a series of deterministic sensitivity analyses (DSA) and probability sensitivity analysis (PSA). We tested key model parameters within plausible ranges during DSA, and matched the reasonable distributions for key model parameters during PSA.

Table S4. Model Parameters and assumptions.

| **Parameters** | **Baseline Value (Ranges for DSA)** | **Distribution for PSA** | **Source** |
| --- | --- | --- | --- |
| **Survival** | | | |
| OS for first-line AEP | Log-logistic θ=0.0035320;κ=1.8033830 | Fixed in PSA | Estimateda |
| OS for first-line EP | Log-logistic θ=0.0002938;κ=2.7910843 | Fixed in PSA | Estimateda |
| PFS for first-line AEP | Log-logistic θ=0.0091770;κ=2.1014940 | Fixed in PSA | Estimateda |
| PFS for first-line EP | Log-logistic θ=0.0001566;κ=4.1798674 | Fixed in PSA | Estimateda |
| **Costs ($US)** | | | |
| Adebrelimab per mg | 0-4.21 | Gamma | Local charge |
| Etoposide per 300mg/m2 | 8.37 (6.70-10.04) | Gamma | Local charge |
| Carboplatin per 5.0 mg/ml/min | 0.40 (0.32-0.48) | Gamma | Local charge |
| Subsequent anticancer therapies | 854.05 (683.24-1024.86) | Gamma | Liu Q, et al |
| Routine follow-up per cycle | 55.60 (44.48-66.72) | Gamma | Liu Q, et al |
| BSC per cycle | 337.50 (270.00-405.00) | Gamma | Liu Q, et al |
| Palliative care per cycle | 2627.80 (2102.24-3153.36) | Gamma | Liu Q, et al |
| AEs management cost for first-line AEP | 2907.01 (2325.61-3488.41) | Gamma | Estimatedb |
| AEs management cost for first-line EP | 2599.55 (2079.64-3119.46) | Gamma | Estimatedb |
| **Utilities** | | | |
| PFD health state | 0.856 (0.718-0.994) | Beta | Shen Y, et al |
| PD health state | 0.768 (0.595-0.941) | Beta | Shen Y, et al |
| AEs disutility for first-line AEP | 0.164 (0.131-0.196) | Beta | Estimatedb |
| AEs disutility in first-line EP | 0.155 (0.124-0.186) | Beta | Estimatedb |
| **Other** |  |  |  |
| Discount rate (%) | 5 (0-8) | Fixed in PSA | Guidelines |
| Mean body surface area (m2) | 1.72 (1.38-2.06) | Normal | Liu Q, et al |
| Creatinine clearance rate (ml/min) | 70 (56-84) | Normal | Liu Q, et al |
| Mean weight (kg) | 65.0 (52.0-78.0) | Normal | Liu Q, et al |
| Male weight (kg) | 69.6 (55.7-83.5) | Normal | National statistics |
| Female weight (kg) | 59.0 (47.2-70.8) | Normal | National statistics |
| Subsequent anticancer therapy in the first-line AEP group (%) | 61.3 (49.0-73.6) | Beta | The CAPSTONE-1 trial |
| Subsequent anticancer therapy in the first-line EP group (%) | 73.7 (59.0-88.4) | Beta | The CAPSTONE-1 trial |

*DSA* deterministic sensitivity analysis, *PSA* probabilistic sensitivity analyses, *OS* overall survival, *PFS* progression-free survival, *AEP* adebrelimab combined with etoposide and platinum, *EP* etoposide plus platinum, *BSC* best supportive care, *AEs* adverse events, *PFD* progression-free disease, *PD* postprogression disease.

aThe parameters of these best-fit survival distributions were estimated based on the Kaplan-Meier curves published in the CAPSTONE-1 trial.

bAEs management cost and AEs disutility associated with each treatment were obtained from Table S3.

**4. The results of DSA for entire patient population**

The result of DSA for entire patient population is illustrated by a tornado diagram. The black dotted line signifies the price ceiling of adebrelimab/mg that can made AEP cost-effective ($0.542). The listed ranges for each parameter depict the lower and upper bounds utilized in DSA.

**
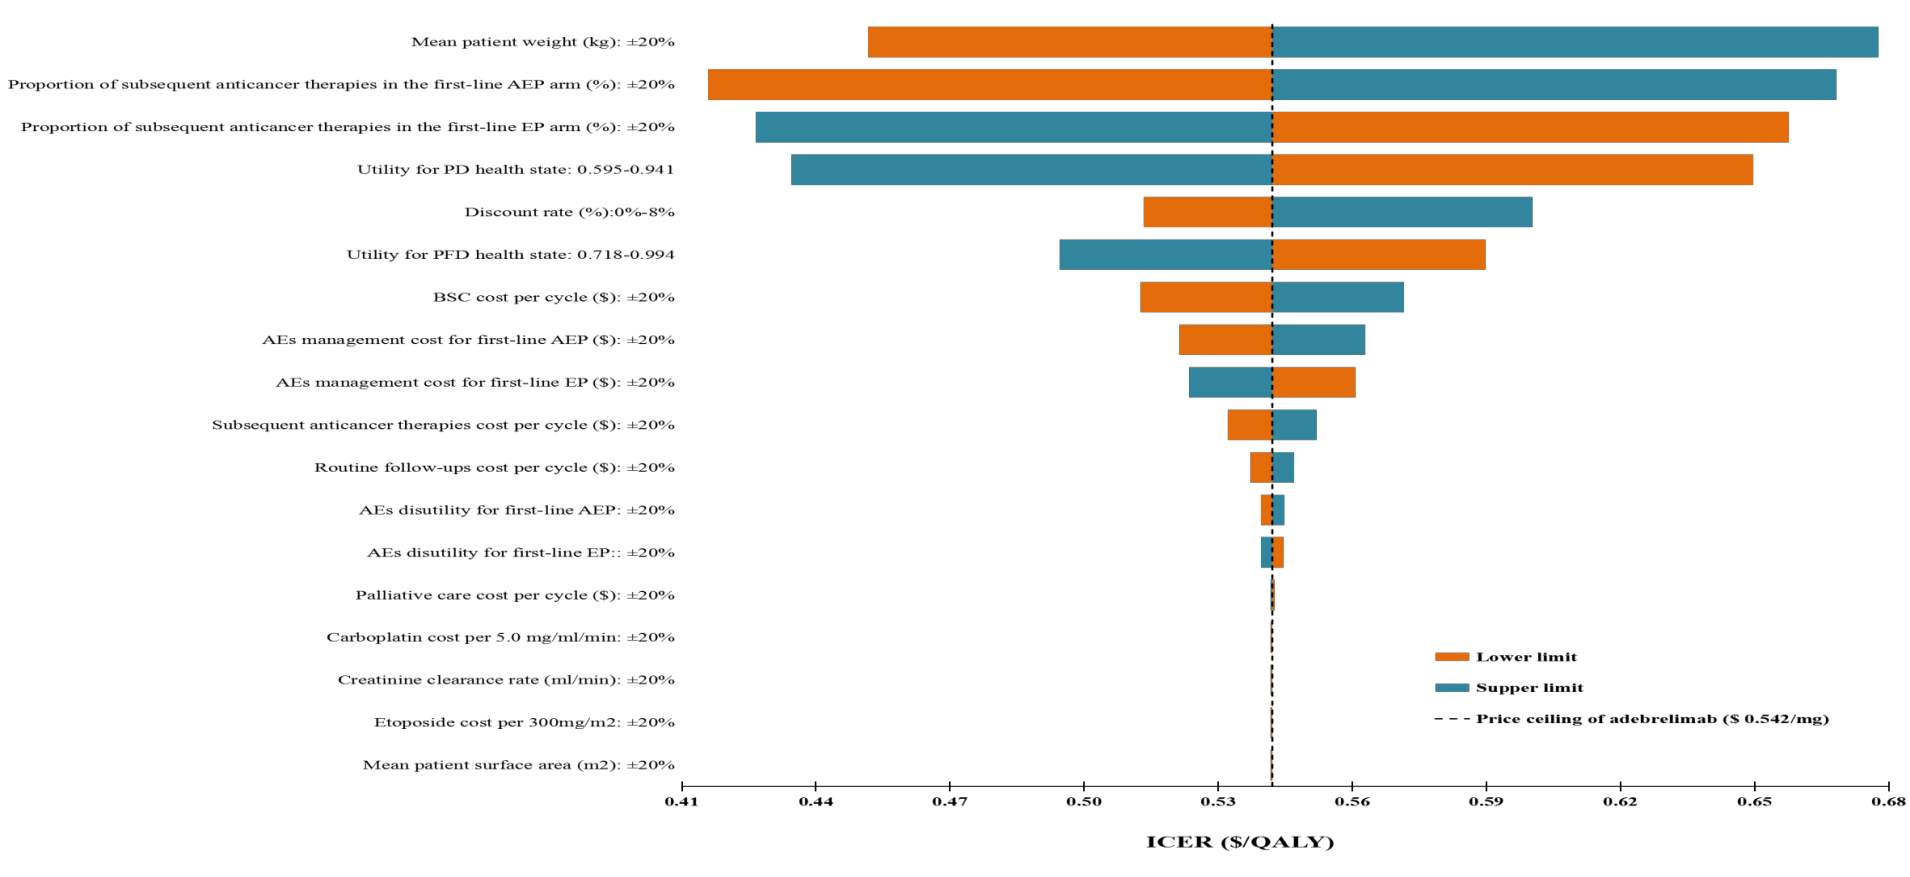
**

**Figure S5** The results of deterministic sensitivity analysis for entire patient population. *AEP* adebrelimab combined with etoposide and platinum, *EP* etoposide plus platinum, *BSC* best supportive care, *PFD* progression-free disease, *PD* postprogression disease, *AEs* adverse events.

**5. The relationship between the price of adebrelimab/mg and the cost-effectiveness probability of first-line AEP versus first-line EP**

Curves with different colors and types reflect the probability of first-line AEP being cost-effective among different subgroups when varing the price of adebrelimab/mg, assuming a willingness-to-pay (WTP) threshold of $37,654 per quality-adjusted life-year (QALY).

**
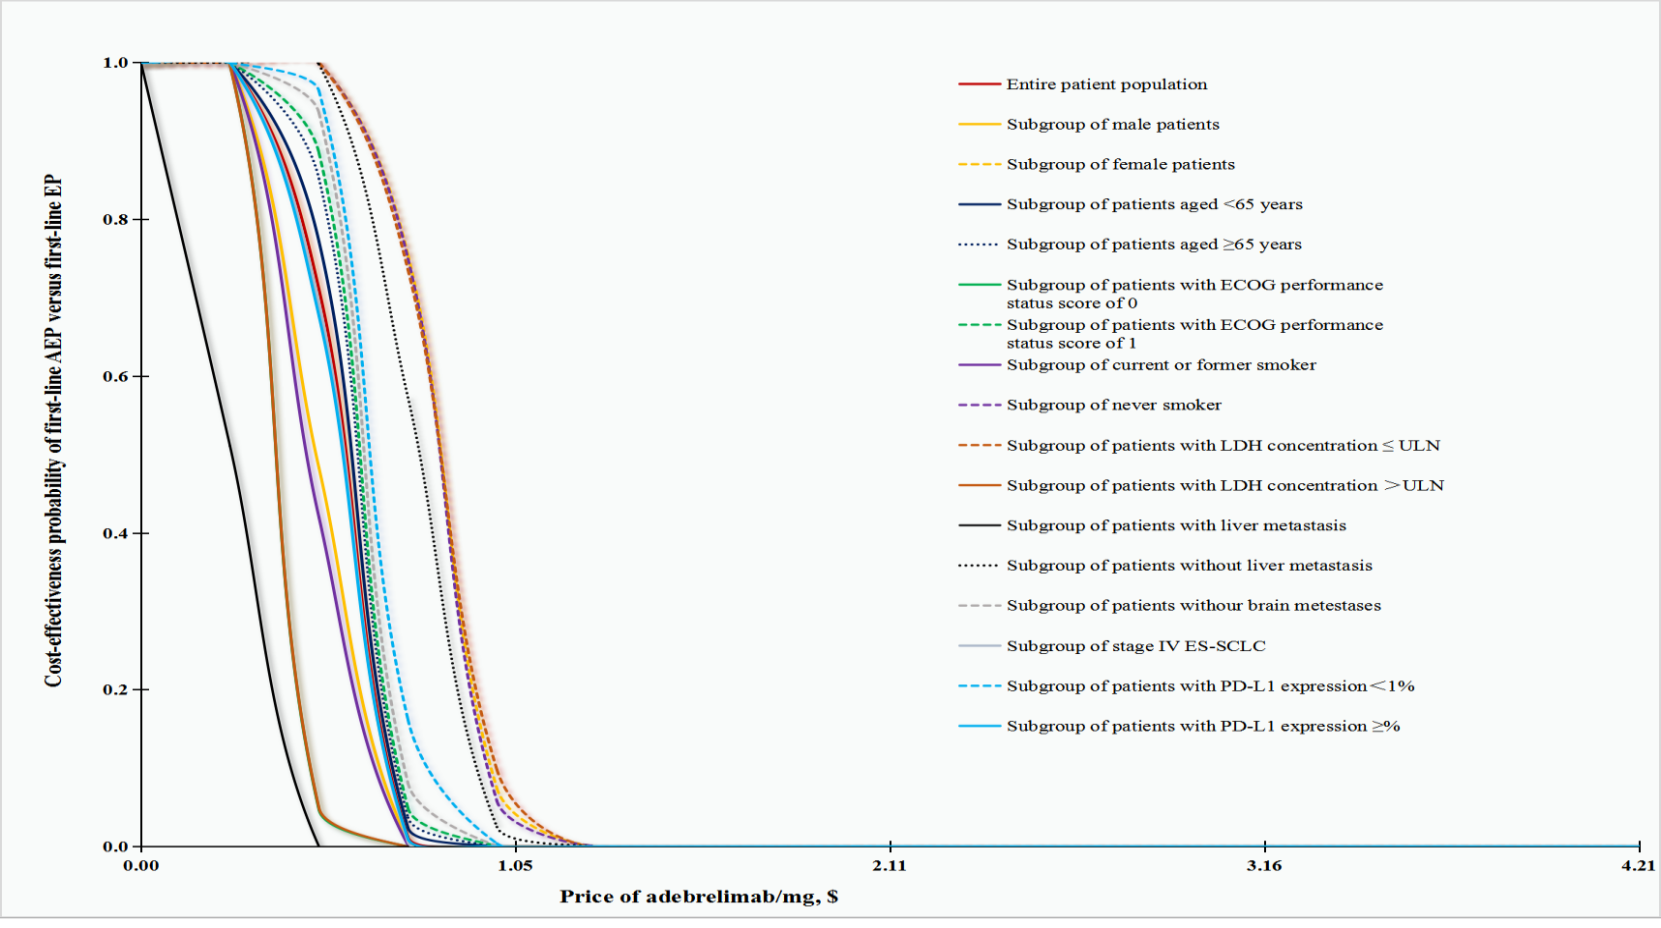
**

**Figure S6** The relationship between the price of adebrelimab/mg and the cost-effectiveness probability of first-line AEP versus first-line EP. *AEP* adebrelimab combined with etoposide and platinum, *EP* etoposide plus platinum, *ECOG* Eastern Cooperative Oncology Group, *LDH* lactate dehydrogenase; *ULN* upper normal limit, *ES-SCLC* extensive stage-small-cell lung cancer, *PD-L1* programmed cell death ligand-1.
